# Supplementary material for: Artificial intelligence in sepsis early prediction and diagnosis using unstructured data in healthcare
Source: Springer Nature journal article supplement (doi:10.1038/s41467-021-20910-4), 2021-01-29
Supplement: 41467_2021_20910_MOESM1_ESM.pdf [file 41467_2021_20910_MOESM1_ESM.pdf]

## **Supplementary Information for “Artificial Intelligence in Sepsis Early Prediction and Diagnosis Using Unstructured Data in Healthcare”**

Kim Huat Goh<sup>1,4\*</sup>, Le Wang<sup>1,4\*</sup>, Adrian Yong Kwang Yeow<sup>2</sup>, Hermione Poh<sup>3</sup>, Ke Li<sup>3</sup>,  
Joannas Jie Lin Yeow<sup>3</sup>, and Gamaliel Yu Heng Tan<sup>3</sup>

<sup>1</sup>Nanyang Business School, Nanyang Technological University, Singapore

<sup>2</sup>School of Business, Singapore University of Social Sciences, Singapore

<sup>3</sup>Academic Informatics Office, Medical Informatics, National University Health System,  
Singapore

<sup>4</sup>These authors contributed equally: Kim Huat Goh and Le Wang

\*Correspondence to: [akhgoh@ntu.edu.sg](mailto:akhgoh@ntu.edu.sg); [lwang033@e.ntu.edu.sg](mailto:lwang033@e.ntu.edu.sg)

## Overview

This document contains supplementary information relating to the paper. Supplementary Figures 1, 3 and 4 provide additional diagnostics of the SERA algorithm reported in the paper. Supplementary Figure 2 presents the detailed sampling frame used in this study.

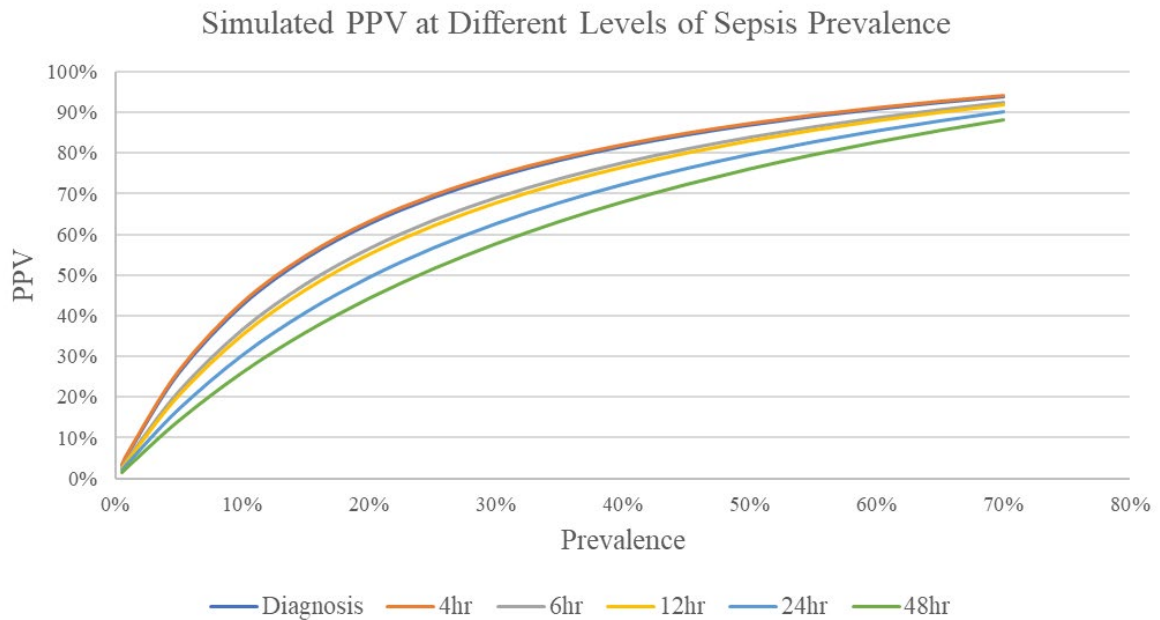

**Supplementary Figure 1: Simulated PPV of SERA algorithm at Different Sepsis Prevalence Levels** The chart shows how the PPV of SERA algorithm varies as sepsis prevalence changes.

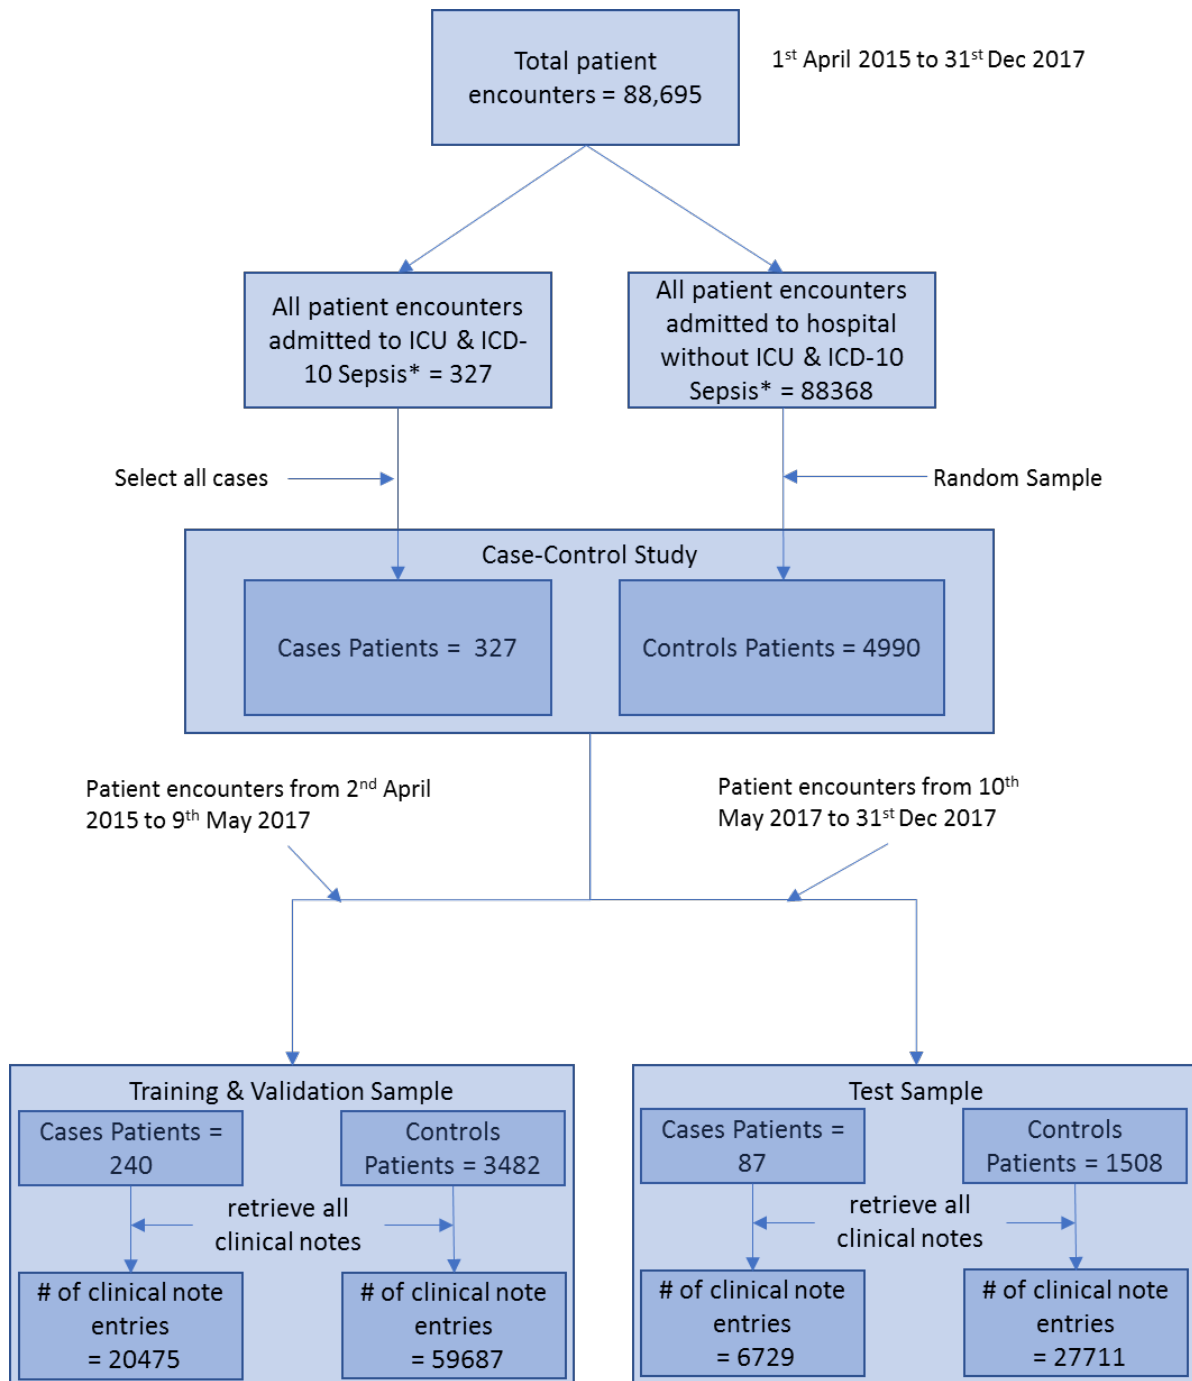

**\* ICD-10 Code:**

Sepsis: 'A40.0','A40.1','A40.8','A40.9','A41.2','A41.0','A41.0Z16','A41.1','A40.3',  
 'A41.4','A41.50','A41.3','A41.51','A41.52','A41.53','A41.59','A41.81','A41.89', 'A41.9'  
 Severe Sepsis: 'R65.20','R65.21','R65.10','R65.11'

**Supplementary Figure 2: Data Sample for Training, Validation, and Testing of SERA Algorithm**

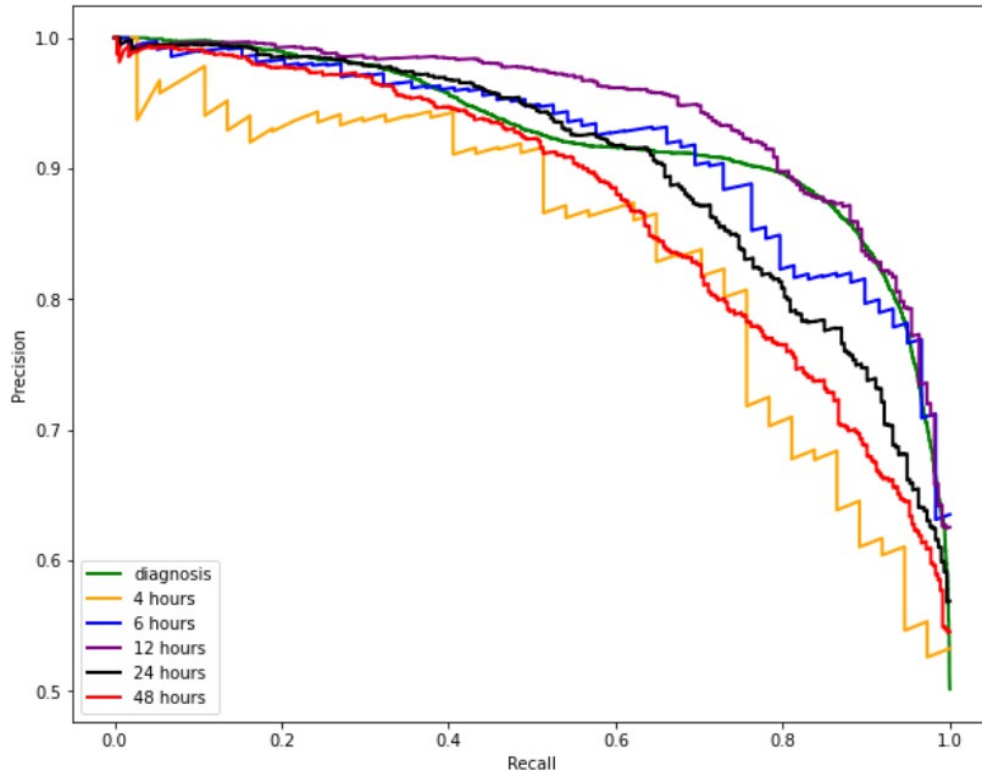

**Supplementary Figure 3: Precision – Recall Curve (SERA algorithm).** The vertical axis (precision) is truncated and starts at 0.5.

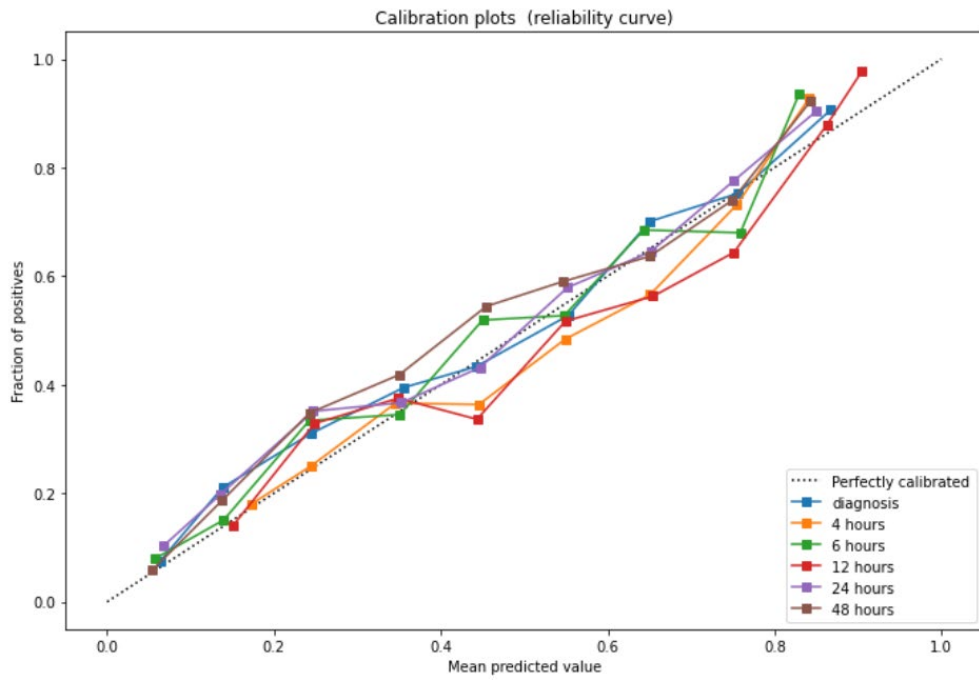

**Supplementary Figure 4: Calibration Curves for SERA Algorithm**
